# Supplementary material for: Potential Contributions of the Tobacco Nicotine-Derived Nitrosamine Ketone to White Matter Molecular Pathology in Fetal Alcohol Spectrum Disorder
Source: PubMed Central journal article supplement (PMC5575815; doi:10.15436/2377-1348.16.729), 2016-07-20
Supplement: NIHMS896491-supplement-supplement_1.pdf [file NIHMS896491-supplement-supplement_1.pdf]

**Supplementary Table 1:** PCR Targeted Array Results. Two-way ANOVA Summary of Ethanol and NNK effects on Oligodendroglial Gene Expression.

| Protein                         | Ethanol Effect |          | NNK Effect |          | Ethanol x NNK Effect |          |
|---------------------------------|----------------|----------|------------|----------|----------------------|----------|
|                                 | F- Ratio       | P- Ratio | F- Ratio   | P- Ratio | F- Ratio             | P- Ratio |
| <b>Immature Oligodendroglia</b> |                |          |            |          |                      |          |
| Nestin                          | 4.800          | 0.059    | 1.200      | N.S      | 1.200                | N.S      |
| Vimentin                        | 0.290          | N.S      | 80.18      | < 0.0001 | 0.009                | N.S      |
| PROM1                           | 576.3          | < 0.0001 | 1065       | < 0.0001 | 457.6                | < 0.0001 |
| CNP                             | 0.350          | N.S      | 4.710      | 0.062    | 0.198                | N.S      |
| PDGFR- $\alpha$                 | 0.637          | N.S      | 12.71      | 0.007    | 0.139                | N.S      |
| GC                              | 8.533          | 0.019    | 16.13      | 0.004    | 4.800                | 0.059    |
| GalC                            | 55.25          | < 0.0001 | 198.7      | < 0.0001 | 16.12                | 0.004    |
| <b>Mature Oligodendroglia</b>   |                |          |            |          |                      |          |
| PLP                             | 4.670          | 0.063    | 15.63      | 0.004    | 5.512                | 0.047    |
| MOG                             | 0.614          | N.S      | 7.445      | 0.026    | 1.752                | N.S      |
| MAG-1                           | 7.588          | 0.025    | 3.247      | 0.109    | 0.324                | N.S      |
| MBP                             | 0.066          | N.S      | 5.792      | 0.043    | 5.687                | 0.044    |
| RTN4                            | 1.345          | N.S      | 13.11      | 0.007    | 1.209                | N.S      |
| RPAIN                           | 177.8          | < 0.0001 | 455.1      | < 0.0001 | 144.0                | < 0.0001 |
| ST8sia1                         | 7.840          | 0.023    | 10.24      | 0.013    | 2.560                | N.S      |

Temporal lobe RNA was analyzed using a targeted PCR array to examine ethanol, NNK and ethanol x NNK interactive effects on Oligodendroglial gene expression. Data were analyzed by Two-way ANOVA with post-hoc Fisher's test. Data are graphed in Figure 1 - 3.

**Back to Top: “↑”**

**Supplementary Table 2:** PCR Targeted Array Results. Two-way ANOVA Summary of Ethanol and NNK effects on Neuroglial and Transcription Factor Gene Expression.

| Protein                      | Ethanol Effect |          | NNK Effect |          | Ethanol x NNK Effect |          |
|------------------------------|----------------|----------|------------|----------|----------------------|----------|
|                              | F- Ratio       | P- Ratio | F- Ratio   | P- Ratio | F- Ratio             | P- Ratio |
| <b>Neuroglial Markers</b>    |                |          |            |          |                      |          |
| CSPG4                        | 1.642          | N.S      | 4.252      | 0.073    | 2.612                | N.S      |
| GFAP                         | 8.237          | 0.021    | 12.18      | 0.008    | 3.518                | 0.098    |
| NCAM                         | 6.223          | 0.037    | 0.004      | N.S      | 0.223                | N.S      |
| NTRK2                        | 3.366          | 0.104    | 104.5      | < 0.0001 | 111.4                | < 0.0001 |
| GSTP1                        | 0.001          | N.S      | 63.87      | < 0.0001 | 0.178                | N.S      |
| GPD1                         | 0.105          | N.S      | 0.039      | N.S      | 0.421                | N.S      |
| GPD2                         | 44.38          | 0.0002   | 61.39      | < 0.0001 | 38.59                | 0.0003   |
| <b>Transcription Factors</b> |                |          |            |          |                      |          |
| FOXO1                        | 29.79          | 0.0006   | 16.04      | 0.004    | 9.729                | 0.014    |
| FOXO4                        | 14.38          | 0.005    | 55.18      | < 0.0001 | 10.83                | 0.011    |
| NKX2-2                       | 2.344          | N.S      | 18.24      | 0.003    | 2.344                | N.S      |
| NKX6-1                       | 425.0          | < 0.0001 | 745.4      | < 0.0001 | 277.0                | < 0.0001 |
| Olig1                        | 0.432          | N.S      | 8.106      | 0.022    | 0.299                | N.S      |
| Olig2                        | 0.301          | N.S      | .590       | N.S      | 0.004                | N.S      |
| PAX6                         | 8.820          | 0.018    | 69.62      | < 0.0001 | 30.42                | 0.0006   |
| SOX9                         | 0.021          | N.S      | 17.66      | 0.003    | 0.173                | N.S      |

Temporal lobe RNA was analyzed using a targeted PCR array to examine ethanol, NNK and ethanol x NNK interactive effects on Oligodendroglial Gene expression. Data were analyzed by Two-way ANOVA with post-hoc Fisher's test. Data are graphed in Figure 4 - 6.

**Back to Top: “↑”**
